# Supplementary material for: Unveiling the LncRNA-miRNA-mRNA Regulatory Network in Arsenic-Induced Nerve Injury in Rats through High-Throughput Sequencing
Source: MDPI journal article supplement (doi:10.3390/toxics11120953), 2023-11-22
Supplement: s1 [file s1]

**Table S1.** Water intake of rats (ml, n=10).

|        | control  | 2mg/L    | 10mg/L   | 50mg/L   |
|--------|----------|----------|----------|----------|
| week1  | 2444.88  | 2366.17  | 2219.22  | 1919.01  |
| week2  | 3261.16  | 3304.09  | 2981.78  | 2353.45  |
| week3  | 3534.25  | 3692.43  | 2857.22  | 2046.87  |
| week4  | 4121.40  | 3802.10  | 2967.00  | 1978.20  |
| week5  | 5104.94  | 4448.77  | 3567.11  | 2071.61  |
| week6  | 4819.30  | 4091.80  | 3250.20  | 1941.74  |
| week7  | 5030.60  | 4549.90  | 3456.31  | 2005.40  |
| week8  | 5084.46  | 4702.84  | 3500.40  | 1889.36  |
| week9  | 5445.80  | 5340.00  | 3798.80  | 2323.20  |
| week10 | 5224.06  | 4516.80  | 3752.90  | 1831.84  |
| week11 | 5721.09  | 5606.40  | 4411.20  | 2387.86  |
| week12 | 6122.32  | 4149.90  | 4507.08  | 2049.23  |
| total  | 55914.26 | 50571.20 | 41269.22 | 24797.77 |

**Table S2.** Arsenic intake of rats (mg, n=10).

|        | control | 2mg/L  | 10mg/L | 50mg/L  |
|--------|---------|--------|--------|---------|
| week1  | 0.00    | 4.73   | 22.19  | 95.95   |
| week2  | 0.00    | 6.61   | 29.82  | 117.67  |
| week3  | 0.00    | 7.38   | 28.57  | 102.34  |
| week4  | 0.00    | 7.60   | 29.67  | 98.91   |
| week5  | 0.00    | 8.90   | 35.67  | 103.58  |
| week6  | 0.00    | 8.18   | 32.50  | 97.09   |
| week7  | 0.00    | 9.10   | 34.56  | 100.27  |
| week8  | 0.00    | 9.41   | 35.00  | 94.47   |
| week9  | 0.00    | 10.68  | 37.99  | 116.16  |
| week10 | 0.00    | 9.03   | 37.53  | 91.59   |
| week11 | 0.00    | 11.21  | 44.11  | 119.39  |
| week12 | 0.00    | 8.30   | 45.07  | 102.46  |
| total  | 0.00    | 101.14 | 412.69 | 1239.89 |
